1 **In-depth single-cell analysis of translation-competent HIV-1 reservoirs identifies**  
2 **cellular sources of plasma viremia**

3

4 Basiel Cole<sup>1</sup>, Laurens Lambrechts<sup>1,2</sup>, Pierre Gantner<sup>3</sup>, Ytse Noppe<sup>1</sup>, Noah Bonine<sup>1,2</sup>,  
5 Wojciech Witkowski<sup>1</sup>, Lennie Chen<sup>4</sup>, Sarah Palmer<sup>5</sup>, James I. Mullins<sup>4,6,7</sup>, Nicolas  
6 Chomont<sup>3,8</sup>, Marion Pardons<sup>1,#</sup>, Linos Vandekerckhove<sup>1,#,\*</sup>

7

8 **Affiliations**

9 <sup>1</sup>HIV Cure Research Center, Department of Internal Medicine and Pediatrics, Ghent University  
10 Hospital, Ghent University, 9000 Ghent, Belgium.

11 <sup>2</sup>BioBix, Department of Data Analysis and Mathematical Modelling, Faculty of Bioscience  
12 Engineering, Ghent University, 9000 Ghent, Belgium

13 <sup>3</sup>Department of Microbiology, Infectiology and Immunology, Université de Montréal, Montreal,  
14 QC, Canada

15 <sup>4</sup>Department of Microbiology, University of Washington, Seattle, Washington, United States of  
16 America.

17 <sup>5</sup>Centre for Virus Research, The Westmead Institute for Medical Research, The University of  
18 Sydney, Sydney 2145, NSW, Australia.

19 <sup>6</sup>Department of Medicine, University of Washington, Seattle, Washington, United States of  
20 America.

21 <sup>7</sup>Department of Global Health, University of Washington, Seattle, Washington, United States of  
22 America.

23 <sup>8</sup>Centre de Recherche du Centre Hospitalier de l'Université de Montréal, Montreal, QC, Canada

24 #These authors contributed equally

25

26 \*Correspondence to:

27 Prof. Dr. Linos Vandekerckhove

28 Department of Internal Medicine and Pediatrics

29 Corneel Heymanslaan 10, 9000 Ghent, Belgium

30 Ghent University

31 [Linos.Vandekerckhove@UGent.be](mailto:Linos.Vandekerckhove@UGent.be)

32 **Abstract**

33 Clonal expansion of HIV-infected cells contributes to the long-term persistence of  
34 the HIV reservoir in ART-suppressed individuals. However, the contribution to plasma  
35 viremia from cell clones that harbor inducible proviruses is poorly understood. Here, we  
36 describe a single-cell approach to simultaneously sequence the TCR, integration sites  
37 and proviral genomes from translation-competent reservoir cells, called STIP-Seq. By  
38 applying this approach to blood samples from eight participants, we showed that the  
39 translation-competent reservoir mainly consists of proviruses with short deletions at the  
40 5'-end of the genome, often involving the major splice donor site. TCR and integration  
41 site sequencing revealed that antigen-responsive cells can harbor inducible proviruses  
42 integrated into cancer-related genes. Furthermore, we found several matches between  
43 proviruses retrieved with STIP-Seq and plasma viruses obtained during ART and upon  
44 treatment interruption, showing that STIP-Seq can capture clones that are responsible for  
45 low-level viremia or viral rebound.

46

47

## 48 **Introduction**

49 HIV-1 infection remains incurable due to the establishment of a persistent viral  
50 reservoir, which is unaffected by antiretroviral therapy (ART)<sup>1-4</sup>. This reservoir mainly  
51 consists of long-lived memory CD4 T cells harboring latent, replication-competent  
52 proviruses, capable of refueling viremia upon treatment interruption (TI)<sup>5-7</sup>. The viral  
53 reservoir is remarkably stable, with an estimated half-life of ~44-48 months, suggesting  
54 that at least 70 years of continuous ART would be required to eliminate it completely<sup>5,8,9</sup>.  
55 Long-term maintenance of the reservoir can in part be explained by clonal expansion of  
56 HIV-infected cells, which is thought to be driven by three non-mutually exclusive forces:  
57 homeostatic proliferation<sup>10-15</sup>, antigenic stimulation<sup>16-18</sup>, and integration site-driven  
58 proliferation<sup>19-22</sup>. Identifying the cellular sources of viral rebound and the mechanisms  
59 that ensure their persistence during ART is needed to develop targeted strategies to  
60 eradicate or control HIV<sup>23-26</sup>.

61 Several sequencing-based assays have been developed to study the HIV  
62 reservoir, each focusing on different aspects of the infected cells and the proviruses  
63 within<sup>27</sup>. Near full-length (NFL) provirus sequencing enables the identification of genome-  
64 intact and potentially replication-competent proviruses<sup>28-31</sup>. Integration site analysis (ISA)  
65 pinpoints the chromosomal location of proviruses and is frequently used as a marker to  
66 study clonal expansion of infected cells<sup>19,20,23,32</sup>. More recently, NFL provirus sequencing  
67 and ISA were combined into a single assay, allowing the study of the relationship between  
68 proviral integration site (IS) and genome structure<sup>33,34</sup>. However, because these assays  
69 are usually performed on bulk CD4 T cell DNA, they mainly identify defective proviruses,  
70 as it has been estimated that only 2-5% of the total proviruses are genome-intact<sup>28,35-37</sup>.

71 As such, they do not focus on proviruses that could lead to viral rebound upon TI. On the  
72 contrary, viral outgrowth assays (VOA) combined with NFL viral genome sequencing  
73 enable the characterization of replication-competent proviruses<sup>3,8,38,39</sup>. However, the IS  
74 of the provirus as well as the phenotype and TCR sequence of the infected cell cannot  
75 be determined with this assay.

76 Alternative assays have been developed to characterize and quantify infected cells  
77 harboring transcription-competent<sup>22,40</sup> or translation-competent<sup>17,40–44</sup> proviruses,  
78 therefore enriching for proviruses with a higher probability of contributing to viral  
79 rebound<sup>45</sup>. These assays use a potent stimulant to reactivate proviruses from latency,  
80 inducing transcription of viral genes and production of viral proteins. Infected cells can  
81 then be identified and isolated by fluorescence-activated cell sorting (FACS). This allowed  
82 for the characterization of NFL proviral genome structure<sup>22,43</sup>, TCR sequences<sup>17,43</sup> and  
83 IS<sup>22</sup> from cells harboring an inducible provirus. However, none of these methodologies  
84 capture all three layers of information simultaneously.

85 Here, we present a novel method, called HIV STIP-Seq: Simultaneous ICR,  
86 Integration site and Provirus sequencing. STIP-Seq enables sequencing of the proviral  
87 genome and matched IS of translation-competent proviruses, as well as phenotypic  
88 characterization and TCR sequencing of the host cell. We used this approach to  
89 characterize infected cells that harbor inducible proviruses from 8 individuals on  
90 suppressive ART. Furthermore, 3 out of 8 participants underwent an ATI, which allowed  
91 us to investigate the contribution of the translation-competent reservoir to residual viremia  
92 and viral rebound.

## 93 **Results**

### 94 **STIP-Seq**

95 STIP-Seq is a derivative of the HIV-Flow assay<sup>41</sup>, with the addition of downstream  
96 whole genome amplification (WGA) and sequencing of the provirus, IS and TCR. Since  
97 WGA by multiple displacement amplification (MDA) is not compatible with cross-linking  
98 fixatives such as paraformaldehyde, we used methanol for simultaneous fixation and  
99 permeabilization, permitting efficient amplification of the cellular genome. Using a dilution  
100 series of J1.1 cells in the parental Jurkat cell line, we showed good linearity of the  
101 frequency of p24+ cells assessed by the methanol-based HIV-Flow assay, down to ~3  
102 p24+ cells/million cells ( $R^2=0.99$ , Supplementary Fig. 1a, b). In addition, methanol fixation  
103 did not have a significant impact on the frequency of p24+ cells ( $p=0.84$ , Supplementary  
104 Fig. 1c).

105 Following methanol-based HIV-Flow, p24+ cells were sorted into individual wells  
106 of a 96-well plate (Fig. 1a, b). Single-cell whole genome amplification by MDA was used  
107 to amplify the DNA of single sorted p24+ cells, including the provirus integrated within.  
108 Amplified genomes were subjected to ISA by Integration Site Loop Amplification (ISLA)  
109 and NFL proviral sequencing using either a 5- or 2-amplicon PCR approach (Fig. 1a,  
110 Supplementary Fig. 2). In addition, the TCR $\beta$  chain of the host cell was sequenced as  
111 described<sup>17</sup>, and index sorting was used for *post hoc* determination of the memory  
112 phenotype of p24+ cells (Fig. 1a, Supplementary Fig. 2).

113

114

115 **STIP-Seq enables deep characterization of the translation-competent HIV-1**  
116 **reservoir in ART-suppressed individuals**

117 To investigate the characteristics of p24-producing cells and their associated  
118 proviruses, we performed STIP-Seq on single sorted CD4 T cells from 8 ART-suppressed  
119 individuals (Supplementary Table 1). Of note, for participant P5, STIP-Seq was performed  
120 on 2 samples collected 3 years apart. A total of 158 p24+ cells and 156 IS were retrieved.  
121 A large proportion of these stemmed from clonally expanded infected cells (74%,  
122 116/156), defined by recurrent identical IS, confirming the often clonal nature of the  
123 translation-competent reservoir<sup>17</sup>.

124 NFL proviral genome sequencing yielded a total of 40 distinct genomes with  
125 complete coverage, which fell within one of three categories: genome-intact (12.5%,  
126 5/40), packaging signal (PSI) and/or major splice donor (MSD) defects (85%, 34/40), or  
127 large internal deletion (2.5%, 1/40) (Fig. 2a, Supplementary Table 2). The PSI/MSD  
128 defective proviruses usually had deletions spanning one or more packaging stem-loops,  
129 all of them involving the MSD located within stem-loop 2 (Fig. 2b). Among these, we  
130 identified 7 proviruses with deletions covering the binding region of the forward primer  
131 from the 5-amplicon NFL PCR (U5-638F), although these deletions could be spanned by  
132 the 2-amplicon approach (F581; Fig. 2b, indicated with triangles). Intriguingly, 16  
133 proviruses (40%) had deletions extending into the *p17* gene, removing the start-codon of  
134 the Gag polyprotein (Supplementary Fig. 3). This implies the use of an alternative start-  
135 codon to enable the translation of the p24 protein<sup>46,47</sup>. Out of 40 distinct NFL sequences  
136 analyzed, only 1 had a large internal deletion (1191 bp; Fig. 2a), and none displayed  
137 inversions or hypermutations (Fig. 2a). This is in contrast with previously reported NFL

138 data that were generated on bulk CD4 T cell DNA<sup>28–30,35</sup>. To investigate this disparity, we  
139 compared NFL genomes obtained by *Full-Length Individual Provirus Sequencing*  
140 (FLIPS)<sup>28</sup> on bulk CD4 T cell DNA with NFL sequences retrieved by STIP-Seq, for two  
141 longitudinal samples from participant P5 (Supplementary Fig. 4). This analysis showed  
142 that proviruses with large internal deletions and hypermutations were absent in p24+  
143 cells, although highly prevalent in bulk CD4 T cells (1/65 hypermutated, 58/65 deleted,  
144 Supplementary Fig. 4). At the second time point, 2/65 proviral genomes recovered from  
145 bulk CD4 T cells were intact, whereas none were detected in p24+ cells (0/11)  
146 (Supplementary Fig. 4). This suggests that these proviruses were not induced by a single  
147 round of PMA/ionomycin stimulation, or they were missed due to the more limited  
148 sampling with STIP-Seq.

149 In order to link the chromosomal location of proviruses to their corresponding  
150 genome structure, ISA was performed on successfully amplified genomes. A bias towards  
151 integration in the reverse orientation with respect to the gene was observed (36/58 in  
152 reverse orientation, 12/58 in same orientation, 3/58 in region with gene on either strand,  
153 9/58 in intergenic region) (Supplementary Table 3). Previous studies have shown an  
154 enrichment of IS in cancer-associated genes, such as *STAT5B* and *BACH2*, suggesting  
155 IS-driven expansion of infected cells<sup>19–21,48,49</sup>. Out of 58 distinct IS, 11 were located within  
156 cancer-associated genes (Fig. 2a, Supplementary Table 3, indicated with asterisks).  
157 Among those, three different IS in the *STAT5B* gene were identified, two of which could  
158 be attributed to clonally expanded cell populations. Of note, all three proviruses were  
159 integrated in the opposite orientation with respect to the gene. Interestingly, for participant  
160 P4, a cell with an intact provirus integrated in the *ZNF274* gene was retrieved (Fig. 2a).

161 This gene was previously described as located in a dense heterochromatin region and  
162 was associated with proviruses in a state of 'deep latency'<sup>50</sup>.

163 It was previously shown that p24+ cells mainly display central memory (TCM),  
164 transitional memory (TTM) and effector memory (TEM) phenotypes<sup>17,41</sup>. Consistent with  
165 this, all but one of the cells identified with STIP-Seq fell within these memory subsets  
166 (60/143 TCM/TTM, 82/143 TEM), with a single cell displaying a naïve phenotype (1/143  
167 TN). When restricting the analysis to clones, 9/20 were found in both the TCM/TTM and  
168 the TEM subset (Fig. 2c), an observation that was previously reported<sup>17,18</sup>. Of note,  
169 proportions of CD4 T cell subsets were only minimally affected by a 24h PMA/ionomycin  
170 stimulation and methanol fixation (Supplementary Fig. 5).

171 In conclusion, these results show that p24+ cells preferentially display a memory  
172 phenotype and are enriched in NFL proviral genomes that have deletions at the 5' end of  
173 the genome. Our data suggest that the MSD, located within stem-loop 2, is a particular  
174 hotspot for deletion among translation-competent proviruses.

## 175 **TCR $\beta$ sequencing reveals clonal infected cell populations with predicted** 176 **responsiveness towards pathogens**

177 Under the hypothesis that infected cell clones with responsiveness towards a  
178 pathogen could have arisen due to cognate antigen exposure, we attempted to predict  
179 the specificity of p24+ cells based on the CDR3 region of the TCR $\beta$  sequence, as  
180 described<sup>17</sup>. A total number of 43 distinct TCR $\beta$  sequences were retrieved. Importantly,  
181 p24+ cells that were previously determined clonal by IS sequencing were also identified  
182 as such based on TCR $\beta$  sequences. The proportion of HIV-infected cells for which  
183 specificity could be predicted was 8/43 (19%) when considering all distinct CDR3



184 sequences, or 5/19 (26%) when restricting to clonal populations (Fig. 3, Supplementary  
185 Table 4). Among all participants, predicted TCR specificities of p24+ cells were confined  
186 to CMV, *M. tuberculosis* and influenza, suggesting that infection with or immunization  
187 against these pathogens plays a role in the maintenance of the translation-competent  
188 reservoir.

189 Participant P3 had a clone with a predicted cross-reactive TCR (CMV, influenza,  
190 *M. tuberculosis*), for which the provirus was integrated in *CD200R1*, a gene not known to  
191 be involved in cell proliferation (Fig. 3). Participants P4 and P6 displayed clones with  
192 predicted specificity towards *M. tuberculosis* and CMV respectively (Fig. 3). Both clones  
193 harbored a provirus integrated at an intergenic region (chr17:8974901 and  
194 chr8:100792125, respectively), suggesting that their expansion was not driven by  
195 promoter insertion (Fig. 3). In contrast, we found several antigen-responsive cells with IS  
196 in genes involved in cell proliferation, as previously described by Simonetti *et al.*<sup>18</sup>.  
197 Participant P3 harbored a clone with an IS in *STAT5B*, potentially allowing for IS-driven  
198 proliferation. Moreover, the TCR specificity towards influenza suggests that the seasonal  
199 flu or vaccination might have contributed to the expansion of this clone (Fig. 3). Similarly,  
200 one expanded clone from participant P7 had predicted specificity towards *M. tuberculosis*  
201 and had an intact provirus integrated in *KCNA3*, a gene involved in T cell activation and  
202 proliferation<sup>51</sup>. Of note, this provirus was integrated in the same orientation as the gene,  
203 which could lead to aberrant transcription and subsequent dysregulation of *KCNA3*  
204 expression.

205 Finally, to investigate the dynamics of the translation-competent reservoir, we  
206 performed STIP-Seq on two longitudinal samples from P5, collected 3 years apart

207 (Supplementary Fig. 6, Supplementary Table 1). While the largest clone at the first  
208 timepoint (IS in *SNX29P1/P2*) was not retrieved 3 years later, one new clone emerged  
209 (IS in *LOC105369901*) and two clones persisted (IS in *ERGIC2* and *MLLT3*). These  
210 observations confirm that HIV-infected cell clones can persist, contract or expand over  
211 time<sup>17,19,52</sup>.

212 Taken together, we show that antigen-responsive cells can harbor inducible  
213 proviruses that are integrated in genes associated with cell proliferation, suggesting that  
214 antigen exposure and IS-driven mechanisms can synergize to favor the persistence of  
215 translation-competent reservoirs.

#### 216 **Proviral sequences recovered with STIP-Seq match plasma virus sequences** 217 **obtained during ART and upon ATI**

218 We then investigated whether proviruses retrieved with STIP-Seq overlap with  
219 plasma virus sequences before and during an ATI. We performed STIP-Seq on CD4 T  
220 cells from three participants (P6, P7, P8), both during ART (T1; last time point before ATI)  
221 and during the ATI (T2; last available time point with undetectable viremia during ATI)  
222 (Fig. 4a, b). Plasma viral sequences (V1-V3 *env*, 894bp) from before (T1) and during the  
223 ATI (T2, T3, T4) were aligned to trimmed NFL sequences obtained with STIP-Seq, and  
224 maximum-likelihood phylogenetic trees were constructed (Fig. 5). The viral reservoir of  
225 two of the three participants (P6, P7) was previously characterized at T1 by FLIPS and  
226 *Matched Integration site and Proviral Sequencing* (MIP-Seq), providing an extensive  
227 resource for comparison with the STIP-Seq assay<sup>26,53</sup>. To this end, NFL proviral genomes  
228 obtained with FLIPS and MIP-Seq were also trimmed to the V1-V3 *env* region and  
229 included in the phylogenetic trees (Fig. 5).

230 A total number of 29 p24+ cells at T1 and 17 p24+ cells at T2 were recovered (Fig.  
231 4b). Overall, little differences were observed between the two timepoints, with most of the  
232 clones identified under ART (T1) persisting during the ATI (T2) (Fig. 4b). However,  
233 participant P6 displayed a novel clone at T2 when compared to T1, with an IS in the *VMP1*  
234 gene (Fig. 4b). Interestingly, the provirus from this clone did not match any V1-V3 *env*  
235 SGS, FLIPS, MIP-Seq or STIP-Seq sequences obtained at T1 (together evaluating n=382  
236 proviruses) (Fig. 5a). In contrast, 3 out of 9 cells recovered by STIP-Seq at T2 yielded  
237 this provirus, indicating that this clone emerged or enlarged during the ATI.

238 For participant P6, one plasma sequence obtained during the ATI (T4) matched a  
239 provirus (IS at chr8:10079212) that was recovered with STIP-Seq at T1 (n=2) and T2  
240 (n=2) (Fig. 5a, indicated with a red box). Interestingly, this provirus had a deletion at the  
241 5'-end of the genome covering a large portion of the *p17* gene (Supplementary Fig. 3),  
242 making it unlikely that it could produce infectious virions. We previously established that  
243 the clonal prediction score (CPS) for the V1-V3 *env* region of participant P6 is 95% (based  
244 on n=22 NFL genomes with detectable V1-V3), indicating that while this score is high,  
245 this subgenomic region is not capable of differentiating all distinct proviruses<sup>53</sup>. Therefore,  
246 we cannot exclude the possibility that this plasma sequence stems from another provirus  
247 that has the same V1-V3 *env* sequence, though differs elsewhere in the genome.

248 For participant P7, five identical plasma sequences recovered at T1 matched an  
249 intact provirus (IS in *KCNA3*) that was identified with STIP-Seq at T1 (n=4) and T2 (n=3),  
250 indicating that this clone was responsible for low-level viremia (LLV) production under  
251 ART (Fig. 5b, indicated with a green box). Interestingly, this clone had a predicted TCR  
252 specificity against *M. tuberculosis*, suggesting that clones responsible for LLV on ART

253 can proliferate in response to a circulating antigen (Fig. 4b). Similarly, one plasma  
254 sequence recovered during T1 matched a provirus (IS at chr17:7545670) that was  
255 identified with STIP-Seq at T1 (n=2) and T2 (n=3) (Fig. 4b). This provirus displayed a 5bp  
256 deletion in stem-loop 2 which removed the MSD, suggesting that a deletion of the MSD  
257 would still allow for detectable virion production (Fig. 5b, indicated by a red box). As  
258 calculated previously, the CPS for the V1-V3 *env* region of participant P7 is 100% (based  
259 on n=17 NFL genomes with detectable V1-V3), giving confidence about the validity of  
260 these matches<sup>53</sup>. Interestingly, FLIPS and MIP-Seq identified 3 additional proviruses that  
261 are genome-intact, but were not detected with STIP-Seq (IS in *ZNF274*, *ZNF141*,  
262 *GGNBP2*) (Fig. 5b). The low number of sampled p24+ cells (n=11 at T1, n=8 at T2, Fig.  
263 4b) could potentially explain this observation, although it is also possible that these  
264 proviruses were not induced after a single round of PMA/ionomycin stimulation.

265 For participant P8, a single clone was identified, with a genome-intact provirus  
266 integrated in the *SMG1P2* pseudogene (Fig. 4b). The proviral sequence matched plasma  
267 sequences at T1, T2 and T3 (n=6, 3, and 1, respectively), suggesting that this clone was  
268 responsible for LLV production under ART, and further contributed to rebound viremia  
269 upon ATI (Fig. 5c, indicated by a green box). Because FLIPS data for this participant was  
270 not available, the CPS could not be calculated. Alternatively, the nucleotide diversity at  
271 T1 was calculated based on proviral V1-V3 *env* sequences, revealing a low diversity  
272 (0.00318 vs. 0.01579 for P6 and 0.01805 for P7)<sup>26</sup>, which could potentially lead to  
273 inaccurate links.

274 In conclusion, we show that STIP-Seq captures clones that contribute to LLV and  
275 viral rebound, and that in some cases, clones contributing to viral rebound already

276 produce LLV during ART. Furthermore, our data suggest that clones responsible for LLV  
277 during ART can proliferate in response to antigenic stimulation.

278

279

280

281

282

283

284

285

286

287

288

289

290

291

292

293

294

## 295 Discussion

296 HIV cure is impeded by the existence of a persistent viral reservoir, capable of  
297 refueling viremia upon treatment interruption. Unraveling mechanisms of viral latency and  
298 reservoir maintenance through clonal proliferation are research priorities in the field.  
299 Previous studies have shown that reservoir persistence is the result of a complex interplay  
300 between proviral genome integrity<sup>28,30</sup>, IS<sup>22,33,50</sup> and antigenic stimulation of infected  
301 cells<sup>16-18</sup>, among other factors. In this regard, several assays have been developed to  
302 investigate these factors individually in ART-suppressed individuals. Here, we introduce  
303 a novel method to simultaneously characterize the NFL proviral genome and IS of  
304 translation-competent proviruses, as well as the phenotype and TCR sequence of the  
305 host cells. STIP-Seq requires only a limited amount of CD4 T cells (~5-10 million) and  
306 overcomes the need for limiting dilutions, as each sorted p24+ cell is HIV-infected. As a  
307 result, STIP-Seq is less labor and reagent intensive than MDA-based approaches on bulk  
308 DNA.

309 Conducting STIP-Seq on blood samples from 8 ART-suppressed individuals  
310 allowed for an in-depth characterization of the translation-competent reservoir. Only  
311 12.5% of proviruses recovered with STIP-Seq were putatively intact, indicating that a  
312 large fraction of the translation-competent reservoir might not be replication-competent,  
313 as previously suggested<sup>37,45</sup>. Interestingly, a large proportion (45%) of the proviruses had  
314 intact open reading frames for all the protein coding genes, in contrast with proviruses  
315 obtained on bulk DNA, which often display large internal deletions, inversions or  
316 hypermutations<sup>28,29</sup>. Nevertheless, most of the proviruses recovered with STIP-Seq had  
317 small deletions (<500 bp) at the 5'-end of the genome, frequently involving a deletion of

318 the MSD, as well as the cryptic donor (CD) site located 4 bp downstream of the MSD<sup>30,54</sup>.  
319 The presence of either of these sites was previously thought to be essential for correct  
320 splicing of viral transcripts and subsequent translation into viral proteins<sup>54,55</sup>. However,  
321 Pollack *et al.* showed that proviruses can bypass MSD deletions and mutations by  
322 activating alternative splice donor sites<sup>56</sup>. Here, we showed that proviruses with MSD/CD  
323 deletions can produce detectable amounts of p24 protein, suggesting that Tat/Rev mRNA  
324 can be produced despite MSD/CD mutations and/or that p24 production following  
325 PMA/ionomycin stimulation can happen in a Tat/Rev-independent manner. Indeed, an *in*  
326 *vitro* study showed that Tat-defective HIV-strains can produce readily detectable p24  
327 following PMA stimulation<sup>57</sup>. Also, since it has been reported that PMA increases the  
328 expression of active NF- $\kappa$ B and P-TEFb<sup>58</sup>, and that NF- $\kappa$ B can directly bind P-TEFb to  
329 promote elongation of transcription in a Tat-independent manner<sup>59</sup>, it is likely that P-TEFb  
330 recruitment by NF- $\kappa$ B increases the levels of unspliced RNA.

331 We also found several translation-competent proviruses with deletions in the  
332 packaging signal (PSI), frequently spanning multiple stem-loops. Although this  
333 observation suggests that these proviruses are not replication-competent, previous  
334 studies have shown that viral genomes can still be packaged despite PSI defects, though  
335 with a considerably lower efficiency<sup>56,60</sup>. Importantly, it has been shown that MSD/PSI  
336 defective proviruses can produce viral proteins that can be recognized by cytotoxic CD8  
337 T cells, leading to chronic immune activation<sup>56,61</sup>. We therefore conclude that while STIP-  
338 Seq does not solely enrich for genome-intact proviruses, it does enrich for proviruses that  
339 are potentially involved in HIV-1 pathogenesis. Future studies on MSD/PSI-defective  
340 proviruses will have to be conducted to further elucidate the effect of MSD/PSI deletions

341 on replication-capacity, including a detailed assessment of viral splicing products and  
342 cloning of MSD/PSI-defective genomes into expression vectors.

343 We identified three distinct IS into *STAT5B*, a gene that was previously described  
344 as a hotspot for HIV-integration in ART-suppressed individuals<sup>19–21,48</sup>. A previous study  
345 has shown that integration in *STAT5B* in the same orientation as the gene can lead to  
346 aberrant splicing and subsequent cellular proliferation<sup>21</sup>. Interestingly, the 3 proviruses  
347 identified in the present study were integrated in the reverse orientation. However, studies  
348 that reported an overrepresentation of IS in the *STAT5B* gene showed that these IS could  
349 be found in both orientations, without an apparent bias<sup>62</sup>. This suggests that integration  
350 in the reverse orientation could still lead to clonal expansion, driven by other mechanisms  
351 than virus-host aberrant splicing.

352 Furthermore, we identified several infected cell clones with predicted specificities  
353 towards CMV, *M. tuberculosis* and influenza, underlining the role of antigen stimulation  
354 as a driver of clonal expansion<sup>16–18</sup>. In accordance with results from Simonetti *et al.*, we  
355 found antigen-responsive clones with IS in genes involved in cell proliferation (*STAT5B*,  
356 *KCNA3*), strengthening the hypothesis of a synergetic effect between IS-driven and  
357 antigen-driven proliferation<sup>18</sup>. Furthermore, our data suggest that one of these clones is  
358 responsible for LLV under ART (*KCNA3*), providing evidence that the proliferation of such  
359 clones can be driven by antigenic stimulation and/or IS-specific mechanisms.

360 In the context of an ATI, we compared p24+ cells obtained before (T1) and at the  
361 beginning of the ATI (T2). In one participant, a novel clone emerged during the ATI, which  
362 was not detected by V1-V3 *env* SGS, FLIPS, MIP-Seq, or STIP-Seq at T1. As we have  
363 previously shown that interferon-stimulated genes are already upregulated at T2 despite



364 an undetectable viral load<sup>63</sup>, we hypothesize that this clonal expansion might have been  
365 driven by the inflammatory environment<sup>64</sup>. In addition, we found identical sequences  
366 between proviruses recovered with STIP-Seq and plasma viral sequences before and  
367 during the ATI, suggesting that HIV-infected clones can produce LLV during ART and/or  
368 contribute to rebound viremia upon ATI. This observation is in line with findings from  
369 Kearney *et al.*, which showed overlap between proviral p6-PR-RT sequences (DNA and  
370 cell-associated RNA, ~1540 bp) and plasma sequences obtained during TI<sup>65</sup>. Because  
371 the matching p6-PR-RT sequences were often clonal in nature, this prior study suggested  
372 that initial rebound could be fueled by clonally expanded populations of infected cells.  
373 Similarly, Aamer *et al.* identified links between plasma sequences recovered during TI  
374 and clonal C2-V5 *env* plasma sequences (~600 bp) that persisted for several years under  
375 treatment, supporting the notion that clonal cell populations that produce LLV under ART  
376 can contribute to viral rebound<sup>66</sup>. Using MDA-based NFL and ISA on bulk CD4 T cell  
377 DNA, Halvas *et al.* identified clonal populations of proviruses that could be linked to  
378 plasma sequences in non-suppressed individuals on ART, though their contribution to  
379 rebound viremia was not investigated<sup>67</sup>. In the present study, we provide deeper insights  
380 by identifying the phenotype and predicted TCR specificity of such clones and linking  
381 them to rebounding plasma sequences.

382 We acknowledge several limitations to this study. First, due to limited sample  
383 availability, we were not able to perform the viral outgrowth assay (VOA). Therefore, we  
384 could not evaluate the replication-competence of proviral sequences obtained with STIP-  
385 Seq by comparing them to sequences from positive VOA wells. Such comparison would  
386 have been particularly interesting for the participants that underwent an ATI, given the

387 notoriously poor overlap between sequences derived from VOA and rebound plasma  
388 sequences<sup>68-72</sup>. Next, the link to rebound plasma sequences was based on a subgenomic  
389 region of the viral genome (V1-V3 *env*). It has previously been shown that using a  
390 subgenomic region to link viral sequences is not always adequate, as some viruses share  
391 the same subgenomic sequence while differing elsewhere in the genome<sup>34,73</sup>. However,  
392 we previously determined the CPS for two of the three participants that underwent an  
393 ATI, revealing high scores: 95% for P6 and 100% for P7<sup>53</sup>. Although the CPS should not  
394 be considered definitive, these scores give confidence about the validity of the observed  
395 matches. Finally, like other assays based on reactivation of proviruses with a latency  
396 reversal agent (LRA), STIP-Seq probably does not pick up all translation-competent  
397 proviruses, as reactivation is a stochastic process<sup>36,58</sup>. In this regard, it has been  
398 suggested that the IS can have an influence on the reactivation of the provirus<sup>33,50,74</sup>, and  
399 that different LRAs might induce reactivation of distinct proviral species<sup>75,76</sup>. As such,  
400 future studies with STIP-Seq investigating the relationship between different classes of  
401 LRA and the IS of the reactivated proviruses, would be of great interest.

402 In conclusion, our STIP-Seq assay enables deep characterization of the  
403 translation-competent HIV reservoir by simultaneously capturing four layers of  
404 information: NFL proviral genome, IS, phenotype and the TCR $\beta$  sequence of the host cell.  
405 By conducting this assay on ART-suppressed individuals, we provide further insights on  
406 the composition of the translation-competent reservoir and its persistence by clonal  
407 proliferation. Applying STIP-Seq in the context of an ATI revealed that cell clones  
408 harboring translation-competent proviruses contribute to residual viremia and viral  
409 rebound upon ART interruption. Using STIP-Seq on a larger cohort of individuals, along

410 with a more elaborate panel of antibodies and different types of LRAs, will help to further  
411 unravel the complex interplay between viral and cellular factors involved in the long-term  
412 persistence of the HIV reservoir.

413

414

415

416

## 417 **Methods**

### 418 **Participants and blood collection**

419 A total of 8 individuals on stably suppressive ART were included in this study  
420 (Supplementary Table 1). Participants P1-P4 were recruited at the McGill University  
421 Health Centre and the Centre Hospitalier de l'Université de Montréal. Participants P5-P8  
422 were recruited at Ghent University Hospital. Participants P6-P8 are part of the HIV-STAR  
423 cohort (Ghent University) (P6 = STAR 10, P7 = STAR 11, P8 = STAR 3). All participants  
424 underwent leukapheresis to collect large numbers of PBMCs. PBMCs were isolated by  
425 Ficoll density gradient centrifugation and were cryopreserved in liquid nitrogen.

### 426 **Ethics statement**

427 All participants were adults and signed informed consent forms approved by the Ethics  
428 Committee of the Ghent University Hospital (Belgium), McGill University Health Centre  
429 and Centre Hospitalier de l'Université de Montréal (Canada).

### 430 **Antibodies**

431 Fixable Viability Stain 510 was obtained from ThermoFisher Scientific (L34957). The  
432 following antibodies were used in sorting experiments: CD8 AF700 Clone RPA-T8  
433 (ThermoFisher, 56-0088-41), CD45RO BV421 Clone UCHL1 (BD Biosciences, 562649),  
434 CD27 BV605 Clone L128 (BD Biosciences, 562656). For p24 staining, we used a  
435 combination of two antibodies: p24 KC57-FITC (Beckman Coulter, 6604665) and p24  
436 28B7-APC (MediMabs, MM-0289-APC).

437

#### 438 **Negative selection of CD4 T cells**

439 CD4 T cells were isolated from PBMC by negative magnetic selection using the EasySep  
440 Human CD4 T Cell Enrichment Kit (StemCell Technology, 19052). Purity was typically  
441 >98%.

#### 442 **HIV-Flow procedure**

443 5-10x10<sup>6</sup> CD4 T cells were resuspended at 2x10<sup>6</sup> cells/mL in RPMI + 10% Fetal Bovine  
444 Serum and antiretroviral drugs were added to the culture (200nM raltegravir, 200nM  
445 lamivudine) to avoid new cycles of replication. Cells were stimulated with 1µg/mL  
446 ionomycin (Sigma, I9657) and 162nM PMA for 24h (Sigma, P8139). Frequencies of p24+  
447 cells were measured by using a combination of 2 antibodies targeting the p24 protein  
448 (p24 KC57-FITC, p24 28B7-APC) as previously described by Pardons *et al.*<sup>41</sup>

#### 449 **Methanol-based HIV-Flow procedure (STIP-Seq)**

450 5-10x10<sup>6</sup> CD4 T cells were resuspended at 2x10<sup>6</sup> cells/mL in RPMI + 10% Fetal Bovine  
451 Serum (FBS, HyClone RB35947) and antiretroviral drugs were added to the culture  
452 (200nM raltegravir, 200nM lamivudine) to avoid new cycles of replication. Cells were  
453 stimulated with 1µg/mL ionomycin (Sigma, I9657) and 162nM PMA (Sigma, P8139). After  
454 a 24h-stimulation, a maximum of 10x10<sup>6</sup> cells per condition were resuspended in PBS  
455 and stained with fixable viability stain 510 for 20 min at RT. Cells were then stained with  
456 antibodies against cell surface molecules (CD8, CD45RO, CD27) in PBS + 2% FBS for  
457 20min at 4°C. After a 5 min-centrifugation step at 4°C to pre-chill the cells, CD4 cells were  
458 vortexed to avoid clumping and 1mL of ice-cold methanol (-20°C) was gently added. Cells  
459 were fixed/permeabilized in methanol for 15 min on ice. Intracellular p24 staining was

460 performed in PBS + 2% FBS using a combination of 2 antibodies (p24 KC57-FITC, p24  
461 28B7-APC) (45min, RT). Cells were then washed and resuspended in PBS for  
462 subsequent sorting. In all experiments, CD4 T cells from an HIV-negative control were  
463 included to set the threshold of positivity. The detailed protocol of the methanol-based  
464 HIV-Flow procedure can be found here: <https://protocols.io/view/methanol-based-hiv-flow-bpedmja6>.  
465

### 466 **Single cell sorting of p24+ cells by fluorescence-activated cell sorting (FACS)**

467 Single p24+ cells were sorted on a BD FACSAria™ Fusion Cell Sorter. The gating  
468 strategy used to sort the cells is represented in Supplementary Fig. 7. Cells were sorted  
469 in skirted 96-well PCR plates (Biorad, Cat. No. 12001925), into a volume of 4 µL PBS sc  
470 1X (Qiagen, Cat. No. 150345). To avoid evaporation of the PBS sc 1X during the sort, the  
471 PCR plate was continuously chilled at 4°C. Index sorting was used to enable phenotyping  
472 of single sorted cells. CD4 T cell memory subsets were defined as follows: TN = CD45RO-  
473 CD27+, TCM/TTM = CD45RO+ CD27+, TEM = CD45RO+ CD27-, TTD = CD45RO-  
474 CD27- (Supplementary Fig. 7). Flow-Jo software v10.6.2 was used to analyze flow  
475 cytometry data (Tree-Star).

### 476 **Multiple Displacement Amplification (MDA)**

477 Whole genome amplification of single sorted cells was carried out by multiple  
478 displacement amplification with the REPLI-g single cell kit (Qiagen, Cat. No. 150345),  
479 according to manufacturer's instructions. A positive control, consisting of ten p24- cells  
480 sorted into the same well, was included on every plate.

### 481 **Quantitative polymerase chain reaction (qPCR) for RPP30**

482 After whole genome amplification, reactions were screened by a binary qPCR on the  
483 RPP30 reference gene. The PCR mix consisted of 5  $\mu$ L 2X LightCycler® 480 Probes  
484 Master (Roche, Cat. No. 04707494001), 1  $\mu$ L MDA product, 0.4  $\mu$ L 10  $\mu$ M forward primer  
485 (5'-AGATTTGGACCTGCGAGCG-3'), 0.4  $\mu$ L 10  $\mu$ M reverse primer (5'-  
486 GAGCGGCTGTCTCCACAAGT-3'), 0.2  $\mu$ L 10  $\mu$ M probe (5'-  
487 TTCTGACCTGAAGGCTCTGCGCG-3') and 3  $\mu$ L nuclease free water. Reactions that  
488 yielded a cycle of threshold (Ct) value of 38 or lower, were selected for further  
489 downstream processing (Supplementary Figure 2).

#### 490 **Integration site analysis**

491 MDA reactions that were positive for RPP30 were subjected to integration site sequencing  
492 by a modified version of the integration site loop amplification (ISLA) assay, as  
493 described<sup>53</sup>. Resulting amplicons were visualized on a 1% agarose gel and positives were  
494 sequenced by Sanger sequencing. Analysis of the sequences was performed using the  
495 'Integration  
496 Sites' webtool (<https://indra.mullins.microbiol.washington.edu/integrationsites>). Cancer-  
497 related genes were identified as described previously<sup>77,78</sup>.

#### 498 **Near Full-Length proviral sequencing**

499 Near full-length HIV-1 proviral sequencing was performed on MDA wells that were RPP30  
500 positive (Supplementary Fig. 1). First, a set of five non-multiplexed PCRs was used to  
501 amplify the proviral genome, yielding five amplicons of approximately 2 kb in length that  
502 together cover 92% of the HIV-1 genome, as described<sup>33</sup>. Amplicons were visualized on  
503 a 1% agarose gel. MDA wells that did not yield an amplicon for all five PCRs were

504 subjected to left and right half genome amplification. The 25  $\mu$ L PCR mix for the first  
505 round is composed of: 5  $\mu$ L 5X Prime STAR GXL buffer, 0.5  $\mu$ L PrimeStar  
506 GXL polymerase (Takara Bio, Cat. No. R050B), 0.125  $\mu$ L ThermaStop (Sigma Aldrich,  
507 Cat. No. TSTOP-500) 250 nM forward primer, 250 nM reverse primer and 1  $\mu$ L REPLI-g  
508 product. The mix for the second round has the same composition and takes 1  $\mu$ L of the  
509 first-round product as an input. Thermocycling conditions for first and  
510 second PCR rounds are as follows: 2 min at 98°C; 35 cycles (10 sec at 98°C, 15 sec at  
511 62°C, 5 min at 68°C); 7 min at 68°C. For selected wells, NFL amplification using a set of  
512 four non-multiplexed PCRs was performed, as described<sup>34</sup>. The primer sequences for the  
513 five-, two- and four-amplicon approaches are summarized in Supplementary Table 5.  
514 Amplicons were pooled and cleaned by magnetic bead purification (Ampure XP,  
515 Beckman Coulter, Cat. No. A63881). Library preparation and sequencing was performed  
516 by short-read Illumina sequencing, as described<sup>28</sup>. De-novo HIV-1 genome assembly was  
517 performed as described<sup>53</sup>. Intactness classification was performed manually, using the  
518 criteria described by Pinzone *et al.*<sup>30</sup>

#### 519 **Full-Length Individual Provirus Sequencing (FLIPS) on bulk CD4 T cell DNA**

520 Full-Length Individual Provirus Sequencing was performed on DNA extracted from total  
521 CD4 T cells with the DNeasy Blood & Tissue Kit (Qiagen, Cat. No. 69504), as described<sup>28</sup>.  
522 Intactness classification was performed manually, using the criteria described by Pinzone  
523 *et al.*<sup>30</sup>

#### 524 **Phylogenetic analyses**



525 Sequences obtained with STIP-Seq, MIP-Seq and FLIPS were trimmed to the V1-V3 *env*  
526 region and multiple aligned to V1-V3 *env* sequences from plasma using MAFFT<sup>79</sup>.  
527 Phylogenetic trees were constructed using PhyML v3.0 (best of NNI and SPR  
528 rearrangements) and 1000 bootstraps<sup>80</sup>. MEGA7 and iTOL v5 were used to visualize  
529 phylogenetic trees<sup>81,82</sup>.

### 530 **TCR sequencing**

531 A previously developed two-step PCR method to amplify a portion of approximately 260bp  
532 of the TCR $\beta$  encompassing (including the CDR3 region) was applied to MDA positive  
533 wells<sup>17</sup>. Briefly, a first multiplex PCR was performed using a set of 35 primers. M13  
534 forward and reverse tags were included to the 5' end of these primers, to allow a second  
535 PCR amplification, which was followed by Sanger sequencing, with M13F and M13R as  
536 sequencing primers. TCR $\beta$  sequences were re-constructed using both forward and  
537 reverse sequences, and were analyzed using the V-QUEST tool of the IMGT<sup>®</sup> database  
538 (IMGT<sup>®</sup>, the international ImMunoGeneTics information system<sup>®</sup>  
539 [<http://www.imgt.org>])<sup>83</sup>.

### 540 **Prediction of TCR specificity**

541 TCR sequences were analyzed using an algorithm to predict antigen specificity: CDR3  
542 sequences were compared to the McPAS-TCR database of TCRs of known antigenic  
543 specificity ([<http://friedmanlab.weizmann.ac.il/McPAS-TCR/>], PMID: 28481982) and  
544 sequence similarities were identified. We predicted TCR specificity using the three criteria  
545 described by Meysman *et al.*<sup>84</sup>: 1) CDR3 sequences should have identical length, 2)  
546 CDR3 sequences should be long enough and 3) CDR3 sequences should not differ by

547 more than one amino acid. Among all CDR3 sequences, those fulfilling these three criteria  
548 with matched CDR3 sequences from the database were considered at high probability of  
549 sharing the same specificity.

#### 550 **Data representations and statistical analyses**

551 Bar charts, line plots and donut plots were generated in R (version 3.4.3) or Graphpad  
552 Prism (version 8.0.2). Alluvial plots were generated in R (version 3.4.3) using the  
553 ggalluvial package (version 0.12.3). For group comparisons, non-parametric Wilcoxon  
554 matched-pairs signed rank tests were used. P values of less or equal to 0.05 were  
555 considered statistically significant.

#### 556 **Data availability**

557 Data will be uploaded to public repositories upon acceptance of the manuscript.

558

559

560

561

562

563

564

565

566

## 567 **References**

- 568 1. Finzi, D. *et al.* Identification of a reservoir for HIV-1 in patients on highly active antiretroviral  
569 therapy. *Science* **278**, 1295–300 (1997).
- 570 2. Wong, J. K. *et al.* Recovery of replication-competent HIV despite prolonged suppression of plasma  
571 viremia. *Science* **278**, 1291–1295 (1997).
- 572 3. Chun, T. W. *et al.* Presence of an inducible HIV-1 latent reservoir during highly active antiretroviral  
573 therapy. *Proc. Natl. Acad. Sci. U. S. A.* **94**, 13193–13197 (1997).
- 574 4. Chun, T. W. *et al.* Early establishment of a pool of latently infected, resting CD4(+) T cells during  
575 primary HIV-1 infection. *Proc. Natl. Acad. Sci. U. S. A.* **95**, 8869–73 (1998).
- 576 5. Finzi, D. *et al.* Latent infection of CD4+ T cells provides a mechanism for lifelong persistence of HIV-  
577 1, even in patients on effective combination therapy. *Nat. Med.* **5**, 512–517 (1999).
- 578 6. Chun, T.-W. *et al.* Rebound of plasma viremia following cessation of antiretroviral therapy despite  
579 profoundly low levels of HIV reservoir: implications for eradication. *AIDS Lond. Engl.* **24**, 2803–2808  
580 (2010).
- 581 7. Colby, D. J. *et al.* Rapid HIV RNA rebound after antiretroviral treatment interruption in persons  
582 durably suppressed in Fiebig I acute HIV infection. *Nat. Med.* **24**, 923–926 (2018).
- 583 8. Siliciano, J. D. *et al.* Long-term follow-up studies confirm the stability of the latent reservoir for HIV-  
584 1 in resting CD4+ T cells. *Nat. Med.* **9**, 727–728 (2003).
- 585 9. Crooks, A. M. *et al.* Precise Quantitation of the Latent HIV-1 Reservoir: Implications for Eradication  
586 Strategies. *J. Infect. Dis.* **212**, 1361–1365 (2015).
- 587 10. Chomont, N. *et al.* HIV reservoir size and persistence are driven by T cell survival and homeostatic  
588 proliferation. *Nat. Med.* **15**, 893–900 (2009).

- 589 11. Bosque, A., Famiglietti, M., Weyrich, A. S., Goulston, C. & Planelles, V. Homeostatic proliferation fails  
590 to efficiently reactivate HIV-1 latently infected central memory CD4+ T cells. *PLoS Pathog.* **7**,  
591 e1002288 (2011).
- 592 12. Vandergeeten, C. *et al.* Interleukin-7 promotes HIV persistence during antiretroviral therapy. *Blood*  
593 **121**, 4321–4329 (2013).
- 594 13. Chomont, N., DaFonseca, S., Vandergeeten, C., Ancuta, P. & Sékaly, R.-P. Maintenance of CD4+ T-cell  
595 memory and HIV persistence: keeping memory, keeping HIV. *Curr. Opin. HIV AIDS* **6**, 30–36 (2011).
- 596 14. Kumar, N. A. *et al.* Antibody-Mediated CD4 Depletion Induces Homeostatic CD4+ T Cell Proliferation  
597 without Detectable Virus Reactivation in Antiretroviral Therapy-Treated Simian Immunodeficiency  
598 Virus-Infected Macaques. *J. Virol.* **92**, e01235-18 (2018).
- 599 15. Bacchus-Souffan, C. *et al.* Relationship between CD4 T cell turnover, cellular differentiation and HIV  
600 persistence during ART. *PLoS Pathog.* **17**, e1009214 (2021).
- 601 16. Mendoza, P. *et al.* Antigen-responsive CD4+ T cell clones contribute to the HIV-1 latent reservoir. *J.*  
602 *Exp. Med.* **217**, e20200051 (2020).
- 603 17. Gantner, P. *et al.* Single-cell TCR sequencing reveals phenotypically diverse clonally expanded cells  
604 harboring inducible HIV proviruses during ART. *Nat. Commun.* **11**, 4089 (2020).
- 605 18. Simonetti, F. R. *et al.* Antigen-driven clonal selection shapes the persistence of HIV-1 infected CD4+  
606 T cells in vivo. *J. Clin. Invest.* (2020) doi:10.1172/JCI145254.
- 607 19. Wagner, T. A. *et al.* HIV latency. Proliferation of cells with HIV integrated into cancer genes  
608 contributes to persistent infection. *Science* **345**, 570–573 (2014).
- 609 20. Maldarelli, F. *et al.* Specific HIV integration sites are linked to clonal expansion and persistence of  
610 infected cells. *Science* **345**, 179–183 (2014).
- 611 21. Cesana, D. *et al.* HIV-1-mediated insertional activation of STAT5B and BACH2 trigger viral reservoir  
612 in T regulatory cells. *Nat. Commun.* **8**, 498 (2017).

- 613 22. Liu, R. *et al.* Single-cell transcriptional landscapes reveal HIV-1–driven aberrant host gene  
614 transcription as a potential therapeutic target. *Sci. Transl. Med.* **12**, eaaz0802 (2020).
- 615 23. Hughes, S. H. & Coffin, J. M. What Integration Sites Tell Us about HIV Persistence. *Cell Host Microbe*  
616 **19**, 588–598 (2016).
- 617 24. Mullins, J. I. & Frenkel, L. M. Clonal Expansion of Human Immunodeficiency Virus-Infected Cells and  
618 Human Immunodeficiency Virus Persistence During Antiretroviral Therapy. *J. Infect. Dis.* **215**, S119–  
619 S127 (2017).
- 620 25. Liu, R., Simonetti, F. R. & Ho, Y.-C. The forces driving clonal expansion of the HIV-1 latent reservoir.  
621 *Viol. J.* **17**, 4 (2020).
- 622 26. De Scheerder, M.-A. *et al.* HIV Rebound Is Predominantly Fueled by Genetically Identical Viral  
623 Expansions from Diverse Reservoirs. *Cell Host Microbe* **26**, 347–358 (2019).
- 624 27. Lambrechts, L., Cole, B., Rutsaert, S., Trypsteen, W. & Vandekerckhove, L. Emerging PCR-Based  
625 Techniques to Study HIV-1 Reservoir Persistence. *Viruses* **12**, (2020).
- 626 28. Hiener, B. *et al.* Identification of Genetically Intact HIV-1 Proviruses in Specific CD4+ T Cells from  
627 Effectively Treated Participants. *Cell Rep.* **21**, 813–822 (2017).
- 628 29. Lee, G. Q. *et al.* Clonal expansion of genome-intact HIV-1 in functionally polarized Th1 CD4+ T cells.  
629 *J. Clin. Invest.* **127**, 2689–2696 (2017).
- 630 30. Pinzone, M. R. *et al.* Longitudinal HIV sequencing reveals reservoir expression leading to decay  
631 which is obscured by clonal expansion. *Nat. Commun.* **10**, 728 (2019).
- 632 31. Rousseau, C. M. *et al.* Large-scale amplification, cloning and sequencing of near full-length HIV-1  
633 subtype C genomes. *J. Virol. Methods* **136**, 118–125 (2006).
- 634 32. Cohn, L. B. *et al.* HIV-1 Integration Landscape during Latent and Active Infection. *Cell* **160**, 420–432  
635 (2015).

- 636 33. Einkauf, K. B. *et al.* Intact HIV-1 proviruses accumulate at distinct chromosomal positions during  
637 prolonged antiretroviral therapy. *J. Clin. Invest.* **129**, 988–998 (2019).
- 638 34. Patro, S. C. *et al.* Combined HIV-1 sequence and integration site analysis informs viral dynamics and  
639 allows reconstruction of replicating viral ancestors. *Proc. Natl. Acad. Sci. U. S. A.* **116**, 25891–25899  
640 (2019).
- 641 35. Bruner, K. M. *et al.* Defective proviruses rapidly accumulate during acute HIV-1 infection. *Nat. Med.*  
642 **22**, 1043–1049 (2016).
- 643 36. Ho, Y.-C. *et al.* Replication-competent noninduced proviruses in the latent reservoir increase barrier  
644 to HIV-1 cure. *Cell* **155**, 540–551 (2013).
- 645 37. Abdel-Mohsen, M. *et al.* Recommendations for measuring HIV reservoir size in cure-directed clinical  
646 trials. *Nat. Med.* **26**, 1339–1350 (2020).
- 647 38. Laird, G. M. *et al.* Rapid quantification of the latent reservoir for HIV-1 using a viral outgrowth assay.  
648 *PLoS Pathog.* **9**, e1003398 (2013).
- 649 39. Lorenzi, J. C. C. *et al.* Paired quantitative and qualitative assessment of the replication-competent  
650 HIV-1 reservoir and comparison with integrated proviral DNA. *Proc. Natl. Acad. Sci. U. S. A.* **113**,  
651 E7908–E7916 (2016).
- 652 40. Grau-Expósito, J. *et al.* A Novel Single-Cell FISH-Flow Assay Identifies Effector Memory CD4+ T cells  
653 as a Major Niche for HIV-1 Transcription in HIV-Infected Patients. *mBio* **8**, e00876-17 (2017).
- 654 41. Pardons, M. *et al.* Single-cell characterization and quantification of translation-competent viral  
655 reservoirs in treated and untreated HIV infection. *PLOS Pathog.* **15**, e1007619 (2019).
- 656 42. Baxter, A. E. *et al.* Single-Cell Characterization of Viral Translation-Competent Reservoirs in HIV-  
657 Infected Individuals. *Cell Host Microbe* **20**, 368–380 (2016).
- 658 43. Cohn, L. B. *et al.* Clonal CD4+ T cells in the HIV-1 latent reservoir display a distinct gene profile upon  
659 reactivation. *Nat. Med.* **24**, 604–609 (2018).

- 660 44. Neidleman, J. *et al.* Phenotypic analysis of the unstimulated in vivo HIV CD4 T cell reservoir. *eLife* **9**,  
661 e60933 (2020).
- 662 45. Baxter, A. E., O’Doherty, U. & Kaufmann, D. E. Beyond the replication-competent HIV reservoir:  
663 transcription and translation-competent reservoirs. *Retrovirology* **15**, 18 (2018).
- 664 46. Kearse, M. G. & Wilusz, J. E. Non-AUG translation: a new start for protein synthesis in eukaryotes.  
665 *Genes Dev.* **31**, 1717–1731 (2017).
- 666 47. Yilmaz, A., Bolinger, C. & Boris-Lawrie, K. Retrovirus translation initiation: Issues and hypotheses  
667 derived from study of HIV-1. *Curr. HIV Res.* **4**, 131–139 (2006).
- 668 48. Ikeda, T., Shibata, J., Yoshimura, K., Koito, A. & Matsushita, S. Recurrent HIV-1 integration at the  
669 BACH2 locus in resting CD4+ T cell populations during effective highly active antiretroviral therapy.  
670 *J. Infect. Dis.* **195**, 716–725 (2007).
- 671 49. Hamann, M. V. *et al.* Transcriptional behavior of the HIV-1 promoter in context of the BACH2  
672 prominent proviral integration gene. *Virus Res.* **293**, 198260 (2020).
- 673 50. Jiang, C. *et al.* Distinct viral reservoirs in individuals with spontaneous control of HIV-1. *Nature* **585**,  
674 261–267 (2020).
- 675 51. Kang, J.-A. *et al.* Epigenetic regulation of Kcna3-encoding Kv1.3 potassium channel by cereblon  
676 contributes to regulation of CD4+ T-cell activation. *Proc. Natl. Acad. Sci. U. S. A.* **113**, 8771–8776  
677 (2016).
- 678 52. Wang, Z. *et al.* Expanded cellular clones carrying replication-competent HIV-1 persist, wax, and  
679 wane. *Proc. Natl. Acad. Sci.* **115**, E2575–E2584 (2018).
- 680 53. Cole, B. *et al.* In-depth characterization of HIV-1 reservoirs reveals links to viral rebound during  
681 treatment interruption. Preprint at  
682 <https://www.biorxiv.org/content/10.1101/2021.02.04.429690v1>. (2021)  
683 doi:10.1101/2021.02.04.429690.

- 684 54. Purcell, D. F. & Martin, M. A. Alternative splicing of human immunodeficiency virus type 1 mRNA  
685 modulates viral protein expression, replication, and infectivity. *J. Virol.* **67**, 6365–6378 (1993).
- 686 55. Das, A. T., Pasternak, A. O. & Berkhout, B. On the generation of the MSD-Ψ class of defective HIV  
687 proviruses. *Retrovirology* **16**, 19 (2019).
- 688 56. Pollack, R. A. *et al.* Defective HIV-1 Proviruses Are Expressed and Can Be Recognized by Cytotoxic T  
689 Lymphocytes, which Shape the Proviral Landscape. *Cell Host Microbe* **21**, 494-506.e4 (2017).
- 690 57. Luznik, L., Kraus, G., Guatelli, J., Richman, D. & Wong-Staal, F. Tat-independent replication of human  
691 immunodeficiency viruses. *J. Clin. Invest.* **95**, 328–332 (1995).
- 692 58. Pardons, M., Fromentin, R., Pagliuzza, A., Routy, J.-P. & Chomont, N. Latency-Reversing Agents  
693 Induce Differential Responses in Distinct Memory CD4 T Cell Subsets in Individuals on Antiretroviral  
694 Therapy. *Cell Rep.* **29**, 2783-2795.e5 (2019).
- 695 59. Barboric, M., Nissen, R. M., Kanazawa, S., Jabrane-Ferrat, N. & Peterlin, B. M. NF-κB Binds P-TEFb to  
696 Stimulate Transcriptional Elongation by RNA Polymerase II. *Mol. Cell* **8**, 327–337 (2001).
- 697 60. Lever, A., Gottlinger, H., Haseltine, W. & Sodroski, J. Identification of a sequence required for  
698 efficient packaging of human immunodeficiency virus type 1 RNA into virions. *J. Virol.* **63**, 4085–  
699 4087 (1989).
- 700 61. Imamichi, H. *et al.* Defective HIV-1 proviruses produce viral proteins. *Proc. Natl. Acad. Sci.* **117**,  
701 3704–3710 (2020).
- 702 62. Anderson, E. M. & Maldarelli, F. The role of integration and clonal expansion in HIV infection: live  
703 long and prosper. *Retrovirology* **15**, 71 (2018).
- 704 63. De Scheerder, M.-A. *et al.* Evaluating predictive markers for viral rebound and safety assessment in  
705 blood and lumbar fluid during HIV-1 treatment interruption. *J. Antimicrob. Chemother.* **75**, 1311–  
706 1320 (2020).



- 707 64. Reed, J. M., Branigan, P. J. & Bamezai, A. Interferon gamma enhances clonal expansion and survival  
708 of CD4+ T cells. *J. Interferon Cytokine Res. Off. J. Int. Soc. Interferon Cytokine Res.* **28**, 611–622  
709 (2008).
- 710 65. Kearney, M. F. *et al.* Origin of Rebound Plasma HIV Includes Cells with Identical Proviruses That Are  
711 Transcriptionally Active before Stopping of Antiretroviral Therapy. *J. Virol.* **90**, 1369–1376 (2016).
- 712 66. Aamer, H. A. *et al.* Cells producing residual viremia during antiretroviral treatment appear to  
713 contribute to rebound viremia following interruption of treatment. *PLoS Pathog.* **16**, e1008791  
714 (2020).
- 715 67. Halvas, E. K. *et al.* HIV-1 viremia not suppressible by antiretroviral therapy can originate from large T  
716 cell clones producing infectious virus. *J. Clin. Invest.* **130**, 5847–5857 (2020).
- 717 68. Lu, C.-L. *et al.* Relationship between intact HIV-1 proviruses in circulating CD4+ T cells and rebound  
718 viruses emerging during treatment interruption. *Proc. Natl. Acad. Sci. U. S. A.* **115**, E11341–E11348  
719 (2018).
- 720 69. Vibholm, L. K. *et al.* Characterization of Intact Proviruses in Blood and Lymph Node from HIV-  
721 Infected Individuals Undergoing Analytical Treatment Interruption. *J. Virol.* **93**, (2019).
- 722 70. Bertagnolli, L. N. *et al.* Autologous IgG antibodies block outgrowth of a substantial but variable  
723 fraction of viruses in the latent reservoir for HIV-1. *Proc. Natl. Acad. Sci. U. S. A.* **117**, 32066–32077  
724 (2020).
- 725 71. Cohen, Y. Z. *et al.* Relationship between latent and rebound viruses in a clinical trial of anti – HIV-1  
726 antibody 3BNC117. *J. Exp. Med.* **215**, 2311–2324 (2018).
- 727 72. Salantes, D. B. *et al.* HIV-1 latent reservoir size and diversity are stable following brief treatment  
728 interruption. *J. Clin. Invest.* **128**, 3102–3115 (2018).

- 729 73. Laskey, S. B., Pohlmeier, C. W., Bruner, K. M. & Siliciano, R. F. Evaluating Clonal Expansion of HIV-  
730 Infected Cells: Optimization of PCR Strategies to Predict Clonality. *PLOS Pathog.* **12**, e1005689  
731 (2016).
- 732 74. Vansant, G. *et al.* The chromatin landscape at the HIV-1 provirus integration site determines viral  
733 expression. *Nucleic Acids Res.* **48**, 7801–7817 (2020).
- 734 75. Chen, H.-C., Martinez, J. P., Zorita, E., Meyerhans, A. & Filion, G. J. Position effects influence HIV  
735 latency reversal. *Nat. Struct. Mol. Biol.* **24**, 47–54 (2017).
- 736 76. Darcis, G. *et al.* An In-Depth Comparison of Latency-Reversing Agent Combinations in Various In  
737 Vitro and Ex Vivo HIV-1 Latency Models Identified Bryostatins-1+JQ1 and Ingenol-B+JQ1 to Potently  
738 Reactivate Viral Gene Expression. *PLoS Pathog.* **11**, e1005063 (2015).
- 739 77. Berry, C. C. *et al.* INSPIRED: Quantification and Visualization Tools for Analyzing Integration Site  
740 Distributions. *Mol. Ther. Methods Clin. Dev.* **4**, 17–26 (2017).
- 741 78. Sherman, E. *et al.* INSPIRED: A Pipeline for Quantitative Analysis of Sites of New DNA Integration in  
742 Cellular Genomes. *Mol. Ther. Methods Clin. Dev.* **4**, 39–49 (2017).
- 743 79. Katoh, K. & Standley, D. M. MAFFT multiple sequence alignment software version 7: improvements  
744 in performance and usability. *Mol. Biol. Evol.* **30**, 772–780 (2013).
- 745 80. Guindon, S. *et al.* New algorithms and methods to estimate maximum-likelihood phylogenies:  
746 assessing the performance of PhyML 3.0. *Syst. Biol.* **59**, 307–321 (2010).
- 747 81. Kumar, S., Stecher, G. & Tamura, K. MEGA7: Molecular Evolutionary Genetics Analysis Version 7.0  
748 for Bigger Datasets. *Mol. Biol. Evol.* **33**, 1870–1874 (2016).
- 749 82. Letunic, I. & Bork, P. Interactive Tree Of Life (iTOL) v4: recent updates and new developments.  
750 *Nucleic Acids Res.* **47**, W256–W259 (2019).
- 751 83. Lefranc, M. P. *et al.* IMGT, the international ImMunoGeneTics database. *Nucleic Acids Res.* **27**, 209–  
752 212 (1999).

753 84. Meysman, P. *et al.* On the viability of unsupervised T-cell receptor sequence clustering for epitope  
754 preference. *Bioinformatics* **35**, 1461–1468 (2019).

755

756

757

## 758 **Acknowledgements and funding sources**

759 We thank all participants who donated samples to the study, as well as MDs and study  
760 nurses who helped with the recruitment and coordination of this study and the processing  
761 of blood samples. The study team thanks Sophie Vermaut for assisting with the flow  
762 cytometry platform. We also thank Bram Parton, Céline Helmoortel and Kim De Leeneer  
763 for helping with the Illumina sequencing. We are grateful for the interesting scientific input  
764 and technical help given by Rémi Fromentin, Caroline Dufour, Amélie Pagliuzza and Sofie  
765 Rutsaert. In addition, we thank Jean-Pierre Routy and Josée Girouard for the recruitment  
766 of the participants in Montreal. This current research work was supported by the NIH  
767 (R01-AI134419, MPI: LV and JIM) and the Research Foundation Flanders (S000319N  
768 and G0B3820N). This work was partially supported by the Canadian Institutes for Health  
769 Research (CIHR; operating grant #364408 and the Canadian HIV Cure Enterprise  
770 (CanCURE) Team Grant HB2 - 164064). BC was supported by FWO Vlaanderen  
771 (1S28918N). LL was supported by FWO Vlaanderen (1S29220N). LV was supported by  
772 the Research Foundation Flanders (1.8.020.09.N.00) and the Collen-Francqui Research  
773 Professor Mandate. MP was supported by postdoctoral funding from VLAIO O&O  
774 (HBC.2018.2278). PG was supported by a postdoctoral fellowship from CIHR (#415209),  
775 and NC was supported by Research Scholar Career Awards of the FRQ-S (#253292).  
776 SP was supported by the Delaney AIDS Research Enterprise (DARE) to Find a Cure  
777 (1U19AI096109 and 1UM1AI126611-01) and the Australian National Health and Medical  
778 Research Council (APP1061681 and APP1149990).

779

780 **Author contributions**

781 BC, MP, LL, WW, NC and LV conceptualized the experiments. Additional scientific input  
782 was given by NC, SP, WW and LV. NC and LV provided the samples used in the study.  
783 BC, MP, LL, YN and NB performed experiments involving cell sorting, multiple  
784 displacement amplification, single NFL proviral sequencing and integration site  
785 sequencing. SP provided protocols and resources for FLIPS sequencing. PG performed  
786 TCR sequencing. JIM and LC provided protocols to perform the 2-amplicon PCR for NFL  
787 proviral sequencing. BC and MP wrote the paper. All authors read and edited the paper.

788 **Competing interests**

789 The authors declare that no conflict of interest exists.

790

791

## Figures

**Figure 1: STIP-Seq enables isolation and characterization of p24-producing cells after PMA/ionomycin stimulation.** (a) Overview of the STIP-Seq assay. CD4 T cells are stimulated for 24 h with PMA (162nM) / ionomycin (1ug/mL). Cells are fixed and permeabilized with methanol, and p24-producing cells are identified using a combination of 2 antibodies (KC57 and 28B7) targeting the p24 protein. p24+ cells are single-cell sorted by flow cytometry. DNA from p24+ cells is amplified by multiple displacement amplification, before performing near full-length (NFL) proviral genome sequencing, integration site analysis, TCR sequencing, and *post-hoc* determination of the CD4 T cell memory phenotype. NFL = near full-length. (b) Representative FACS dot plots showing the KC57-FITC/28B7-APC co-staining on CD4 T cells from 1 HIV non-infected control, 1 viremic and 3 ART-treated individuals.

**Figure 2: Near full-length proviral sequencing, integration site analysis and subset analysis on p24-producing cells from ART-treated individuals.** (a) Virogram showing the near full-length proviral genomes recovered from 8 ART-treated individuals. Proviral genomes were reconstructed using a 5-amplicon, 2-amplicon or 4-amplicon PCR-approach. Corresponding integration sites (IS) are indicated at the right-hand side of each proviral genome. Cancer-related genes are indicated with an asterisk. (b) Heatmap of the deletions in the 5' UTR region, including the  $\Psi$  packaging signal. The second-round forward primers for the 2-amplicon (F591) and 5-amplicon (U5-638F) NFL PCR-approach are annotated with arrows on the heatmap. Proviruses with a deletion spanning the U5-638F primer are indicated with a triangle at the left-hand side of each provirus. MSD = major splice donor, CD = cryptic donor. (c) Memory subset distribution of clonal p24-producing cells. The number of cells within each clone is indicated at the left-hand side of each horizontal bar. TCM = central memory T cell, TTM = transitional memory T cell, TEM = effector memory T cell.

**Figure 3: Predicted TCR specificity of single p24-producing cells.** Alluvial plots showing the memory phenotype of the host cell, the IS and the NFL class for each p24-producing cell from n=8 ART-treated individuals. Single p24+ sorted cells are represented

on the y-axis of each plot. Alluvials connecting the different categories are colored according to predicted TCR specificity. Only time points on ART are represented on this figure. IS = integration site, TCR = T cell receptor, NFL = near full-length, TN = naïve T cell, TCM = central memory T cell, TTM = transitional memory T cell, TEM = effector memory T cell.

**Figure 4: STIP-Seq on three participants before and during an analytical treatment interruption (ATI).** (a) Viral load diagram showing the sampling timepoints before (T1) and during (T2, T3, T4) the analytical treatment interruption for 3 participants (P6, P7, P8). The viral load was undetectable at T1 and T2, under 1000 cp/mL at T3 (early rebound) and above 1000 cp/mL at T4 (late rebound). The vertical red line depicts the start of the ATI. LOD = limit of detection. (b) Donut charts displaying integration sites, NFL class, and memory subsets of p24-producing cells recovered before (T1) and during (T2) an ATI. The number of analyzed p24+ cells is indicated for each participant. PSI = packaging signal, MSD = major splice donor, TCM = central memory T cell, TTM = transitional memory T cell, TEM = effector memory T cell, NFL = near full-length.

**Figure 5: STIP-Seq identifies clones responsible for viremia under ART and upon treatment interruption.** (a-c) Maximum-likelihood phylogenetic trees for 3 participants who underwent an analytical treatment interruption. The trees include V1-V3 *env* plasma sequences from before (T1) and during (T2, T3, T4) the treatment interruption (P6, P7, P8), as well as STIP-Seq, MIP-Seq and FLIPS sequences (T1) that were trimmed to the V1-V3 *env* region (P6, P7). Intact and defective proviruses are represented by circles and squares respectively, while V1-V3 plasma sequences are represented by triangles. Each assay is color-coded. Clones displaying a match between defective and intact STIP-Seq sequences and plasma sequences are indicated by red and green frames, respectively. HXB2 = subtype B HIV-1 reference genome, NFL = near full-length, STIP-Seq = Simultaneous TCR, Integration site and Provirus sequencing, MIP-Seq = Matched Integration site and Provirus sequencing, FLIPS = Full-Length Individual Provirus sequencing.

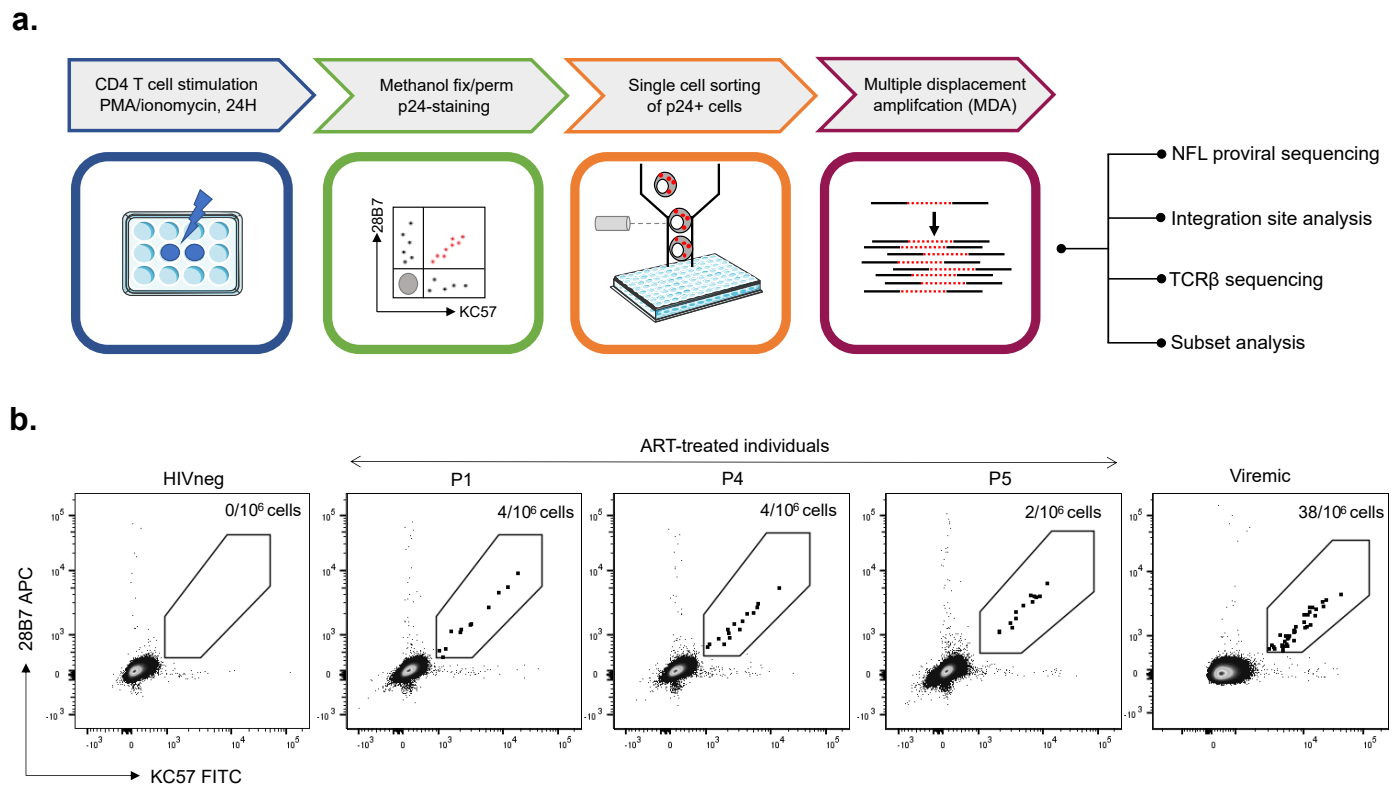



a.

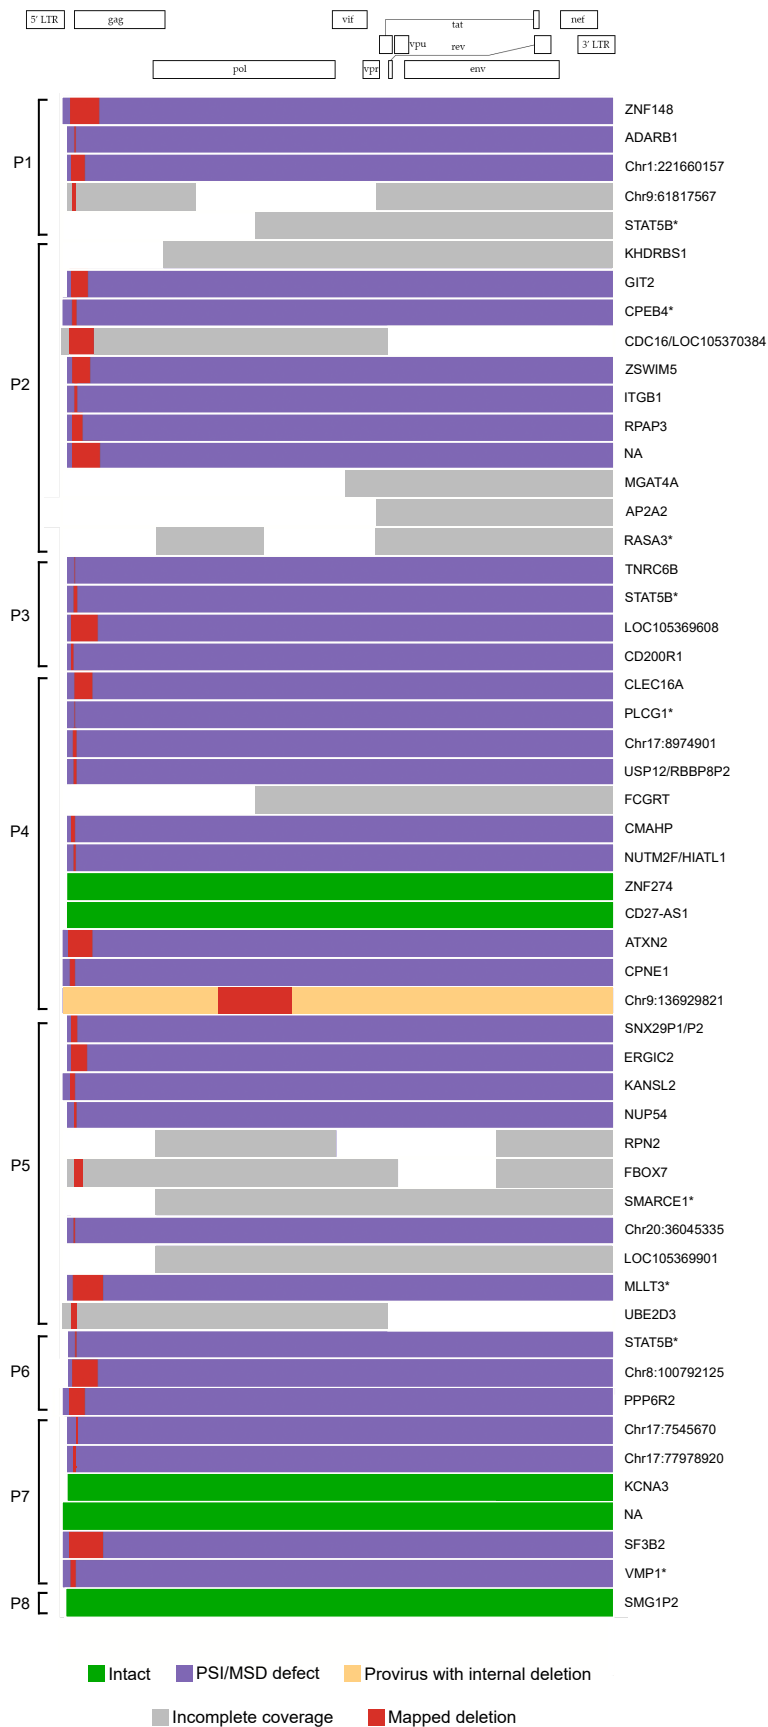

b.

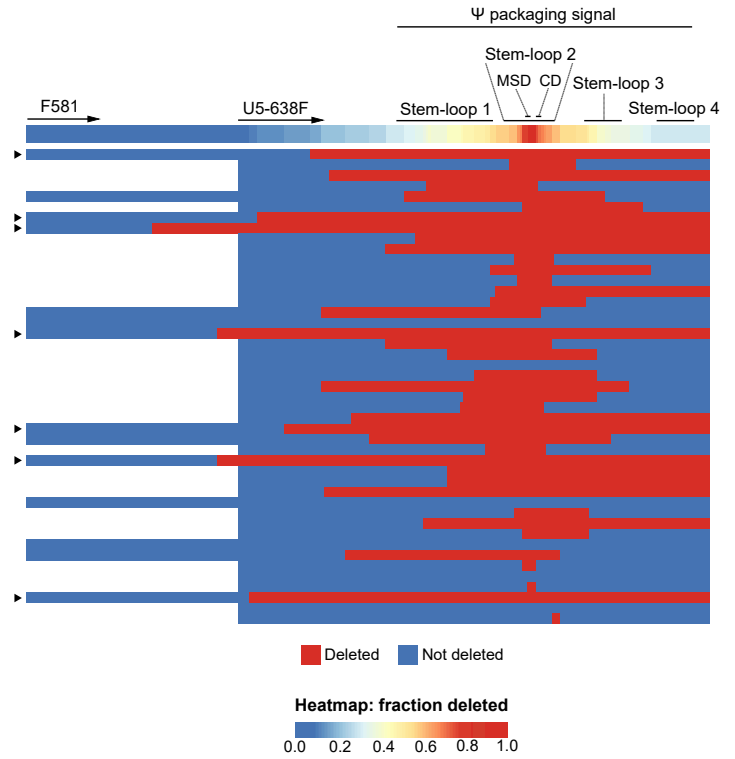

c.

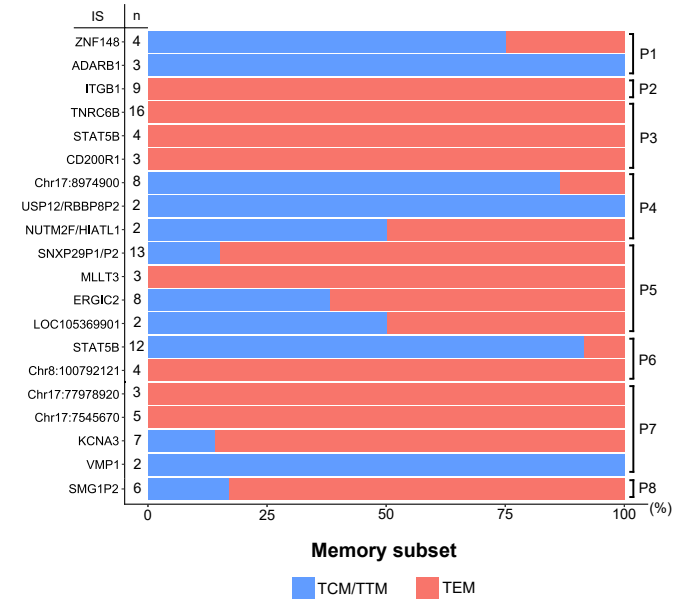

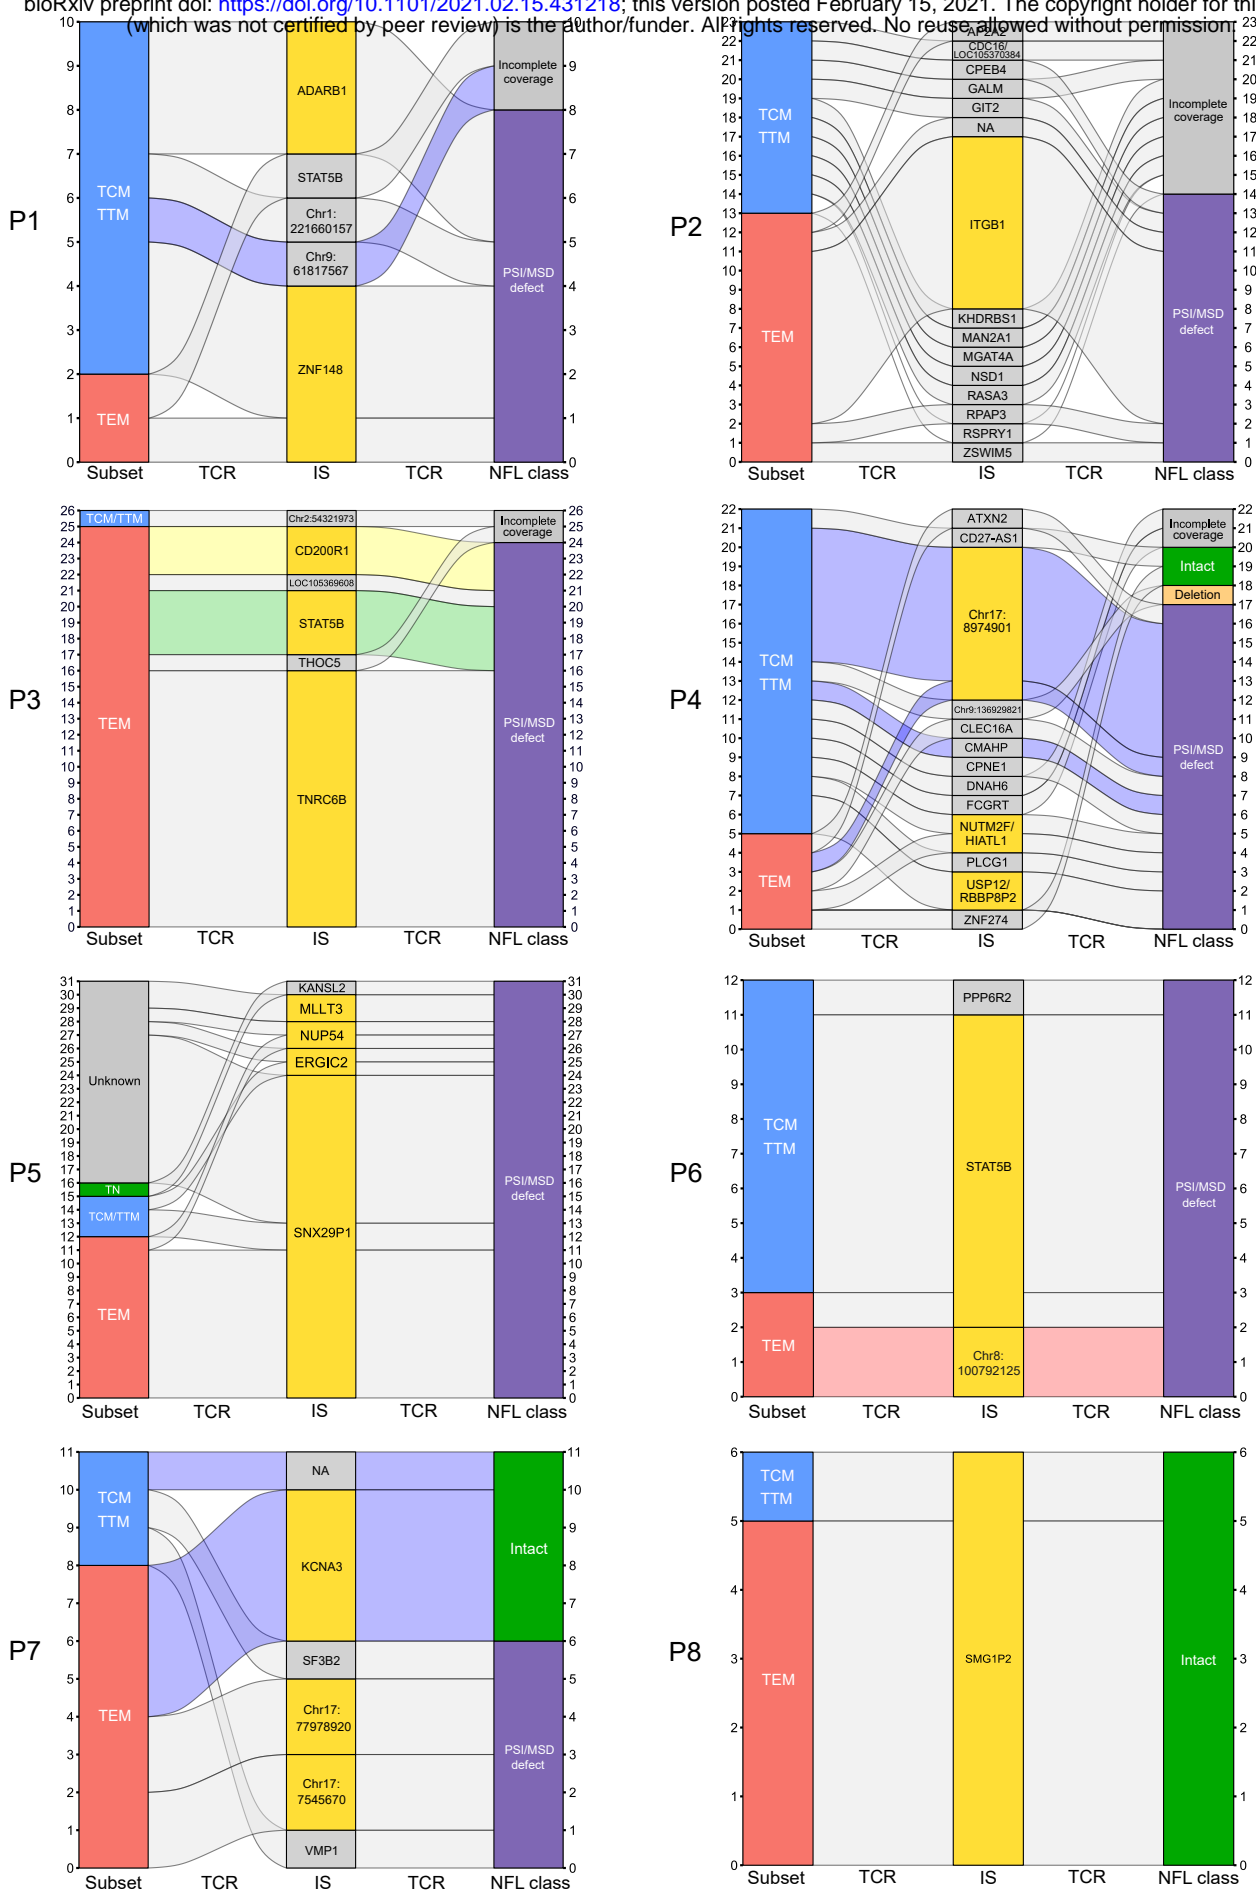

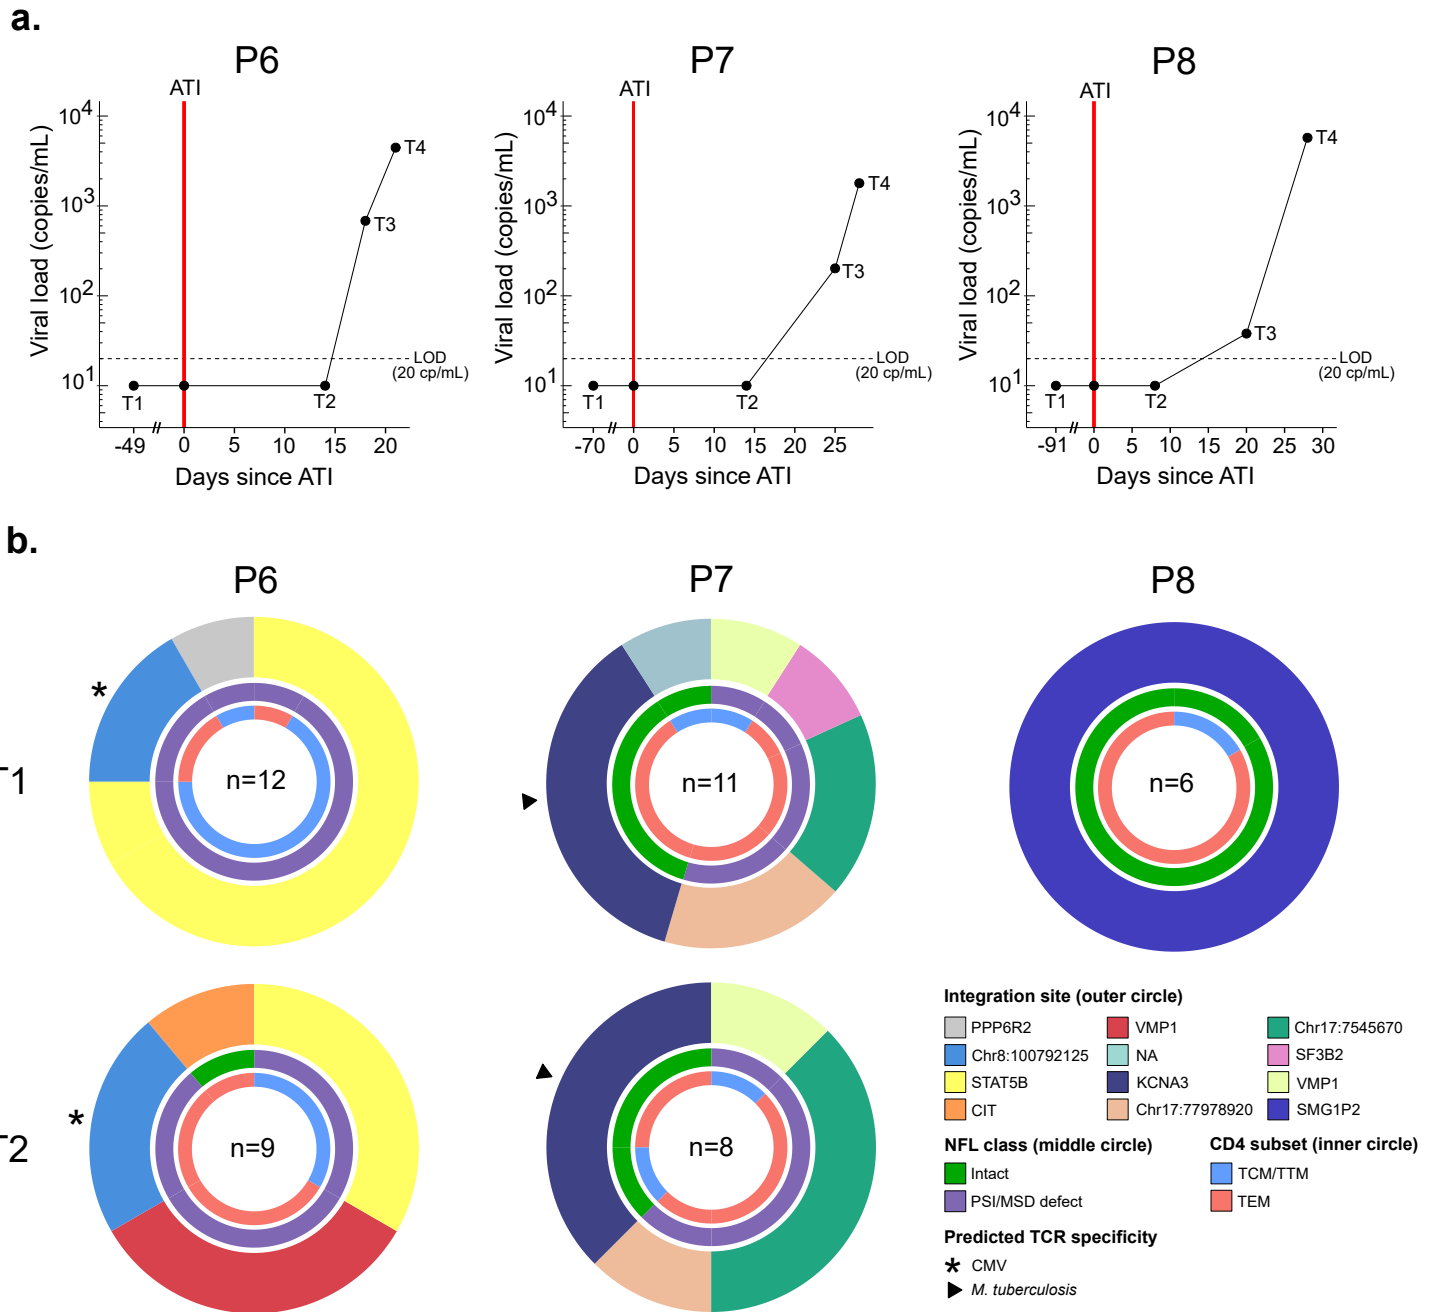

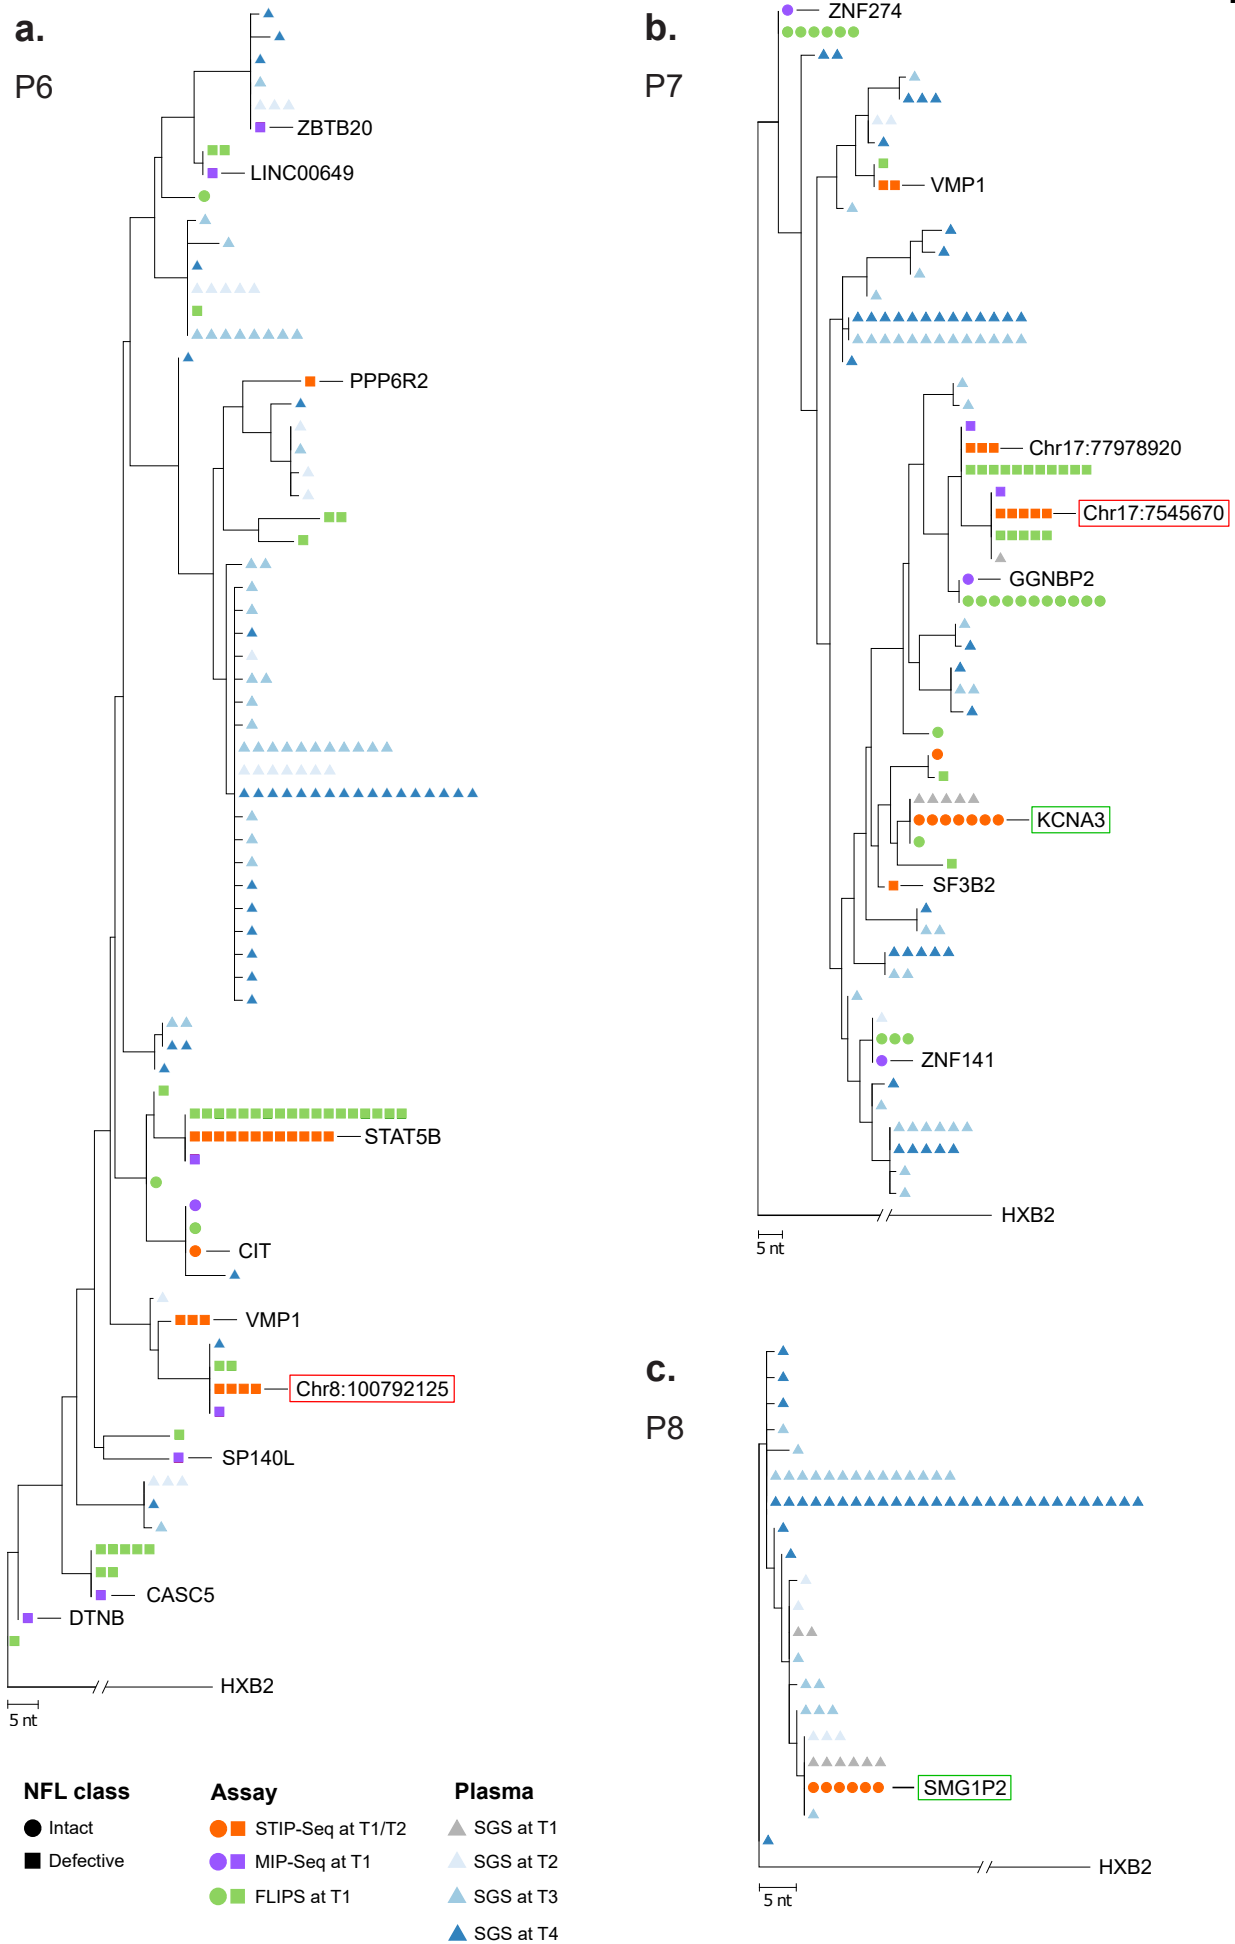

Source: https://biorxiv.org/content/10.1101/2021.02.15.431218v1.full.pdf
